# Supplementary material
Source: publisher site journal article supplement (https://www.dovepress.com/article/367350)
Supplement: Supplementary file 1 [file get_supplementary_file.php]

## **Characterization of 6-paradol, 6-gingerol and 6-shogaol in AfperFit**

### **Materials**

6-Paradol (HPLC grade, 98%) was procured from Chemfaces (China). 6-Gingerol (98 %) and 6-Shogaol (98 %) were procured from Sigma-Aldrich and China, respectively. All reagents and solvents were of analytical grade.

### **Method**

HPLC was performed on a Shimadzu LC2030 C Prominence-i (Japan) system equipped with a quaternary low-pressure gradient solvent delivery LC2030 pump with high-pressure switching valves, online LC2030 degasser unit, a high sensitivity LC2030 ultraviolet (UV) detector, high speed drive LC2030 autosampler and large capacity column oven. The system controlled and data analyzed by LabSolutions software. A separation was carried out in Kinetex C-18 column (100 Å, 250 mm × 4.6 mm, 5 µm pore size).

6-paradol in AfperFit was quantitatively analysed at UV detection of 230 nm using a mobile phase of a mixture of orthophosphoric acid (0.2%): acetonitrile (40:60) with isocratic flow rate of 1.2 ml/min and the injection volume of 5 µl. For the analysis of 6-shogaol and 6-gingerol contents in AfperFit a mobile phase of formic acid (0.5%): acetonitrile (10:90) with an isocratic flow rate of 0.5 ml/min was used. The compounds were quantified at UV detection of 280 nm. All solutions were degassed and filtered through 0.45 µm pore size filter. The column was maintained at 26 °C throughout analysis. Methanol was used as a diluent and the total liquid chromatography (LC) run time was 20 min. The peaks of compounds in AfperFit were quantified by comparing with the retention time (RT) of respective reference standards separately.

**A**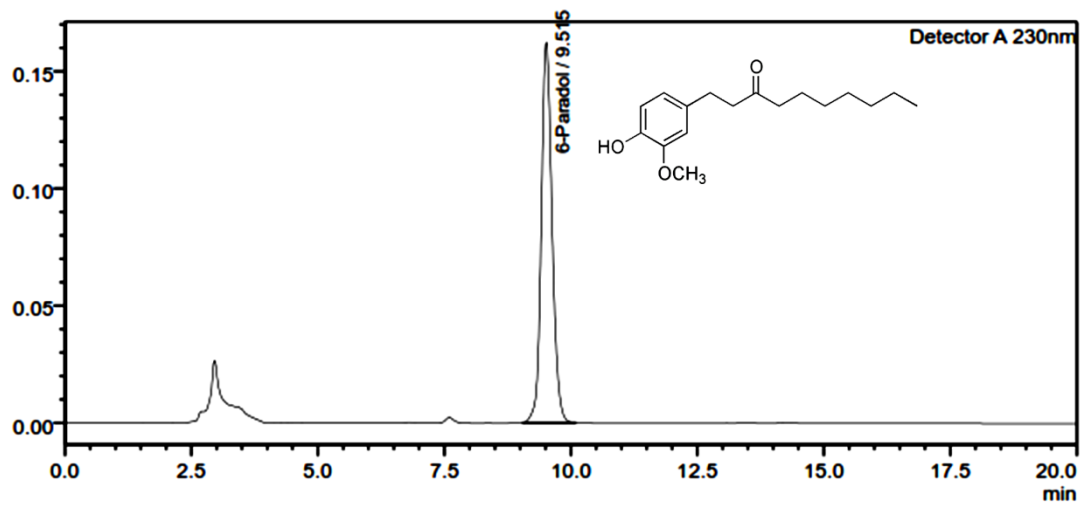**B**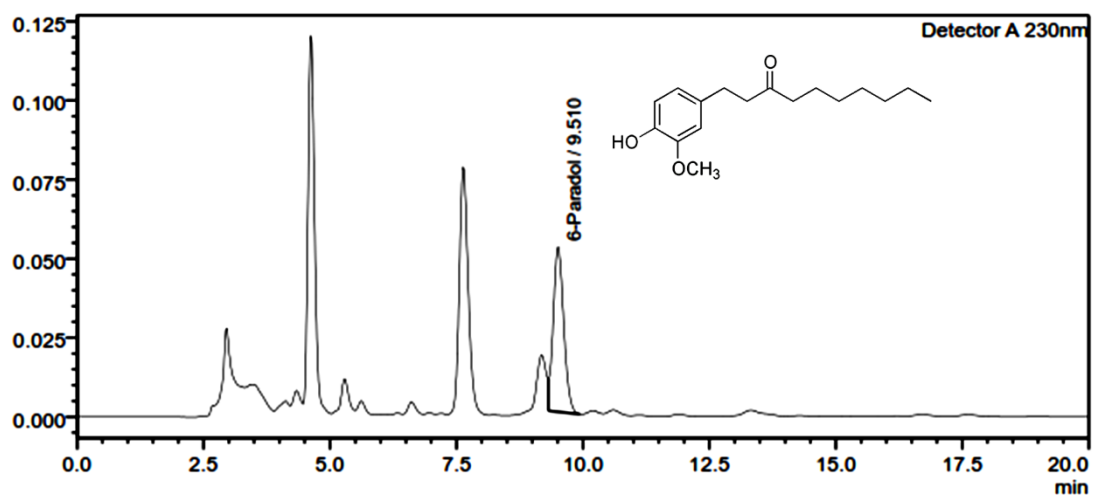

**Supplementary Figure 1.** HPLC chromatogram of 6-paradol. (A) Reference standard and (B) AfperFit

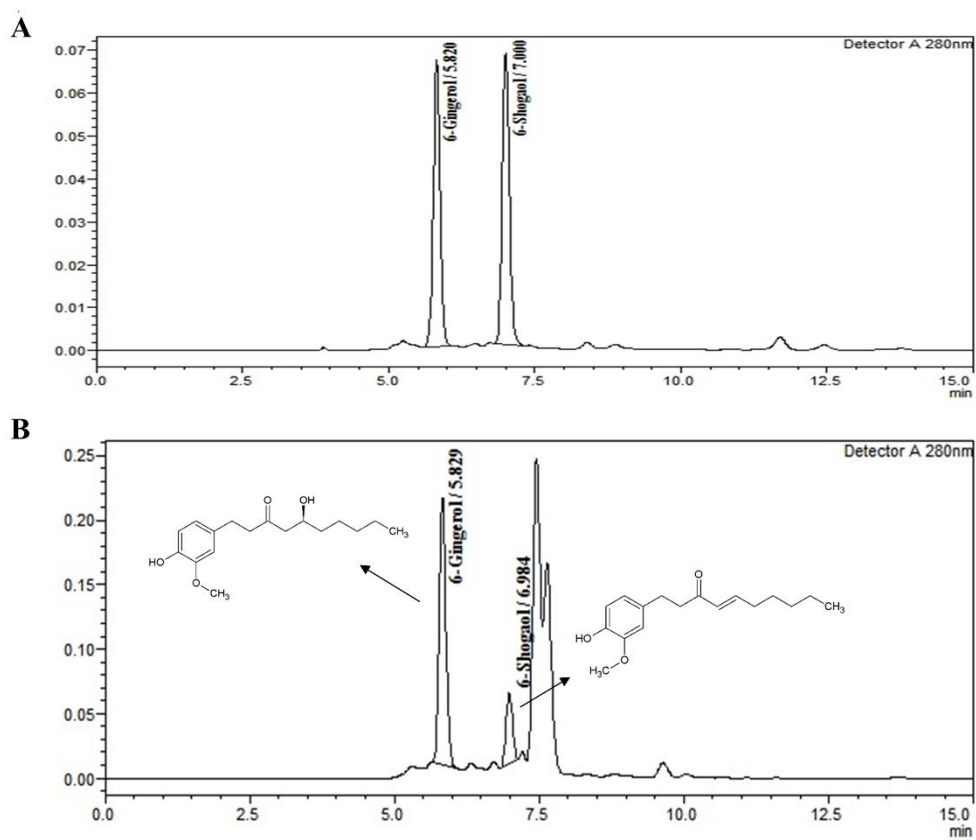

**Supplementary Figure 2. HPLC chromatogram of 6-gingerol and 6-shogaol. (A) Reference standard and (B) AferFit**

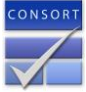

# CONSORT 2010 checklist of information to include when reporting a randomised trial\*

| Section/Topic                    | Item No | Checklist item                                                                                                                                                                              | Reported on page No |
|----------------------------------|---------|---------------------------------------------------------------------------------------------------------------------------------------------------------------------------------------------|---------------------|
| <b>Title and abstract</b>        |         |                                                                                                                                                                                             |                     |
|                                  | 1a      | Identification as a randomised trial in the title                                                                                                                                           | 01                  |
|                                  | 1b      | Structured summary of trial design, methods, results, and conclusions (for specific guidance see CONSORT for abstracts)                                                                     | 01                  |
| <b>Introduction</b>              |         |                                                                                                                                                                                             |                     |
| Background and objectives        | 2a      | Scientific background and explanation of rationale                                                                                                                                          | 02                  |
|                                  | 2b      | Specific objectives or hypotheses                                                                                                                                                           | 03                  |
| <b>Methods</b>                   |         |                                                                                                                                                                                             |                     |
| Trial design                     | 3a      | Description of trial design (such as parallel, factorial) including allocation ratio                                                                                                        | 04                  |
|                                  | 3b      | Important changes to methods after trial commencement (such as eligibility criteria), with reasons                                                                                          | N/A                 |
| Participants                     | 4a      | Eligibility criteria for participants                                                                                                                                                       | 04                  |
|                                  | 4b      | Settings and locations where the data were collected                                                                                                                                        | 04                  |
| Interventions                    | 5       | The interventions for each group with sufficient details to allow replication, including how and when they were actually administered                                                       | 04                  |
| Outcomes                         | 6a      | Completely defined pre-specified primary and secondary outcome measures, including how and when they were assessed                                                                          | 05                  |
|                                  | 6b      | Any changes to trial outcomes after the trial commenced, with reasons                                                                                                                       | N/A                 |
| Sample size                      | 7a      | How sample size was determined                                                                                                                                                              | 04                  |
|                                  | 7b      | When applicable, explanation of any interim analyses and stopping guidelines                                                                                                                | N/A                 |
| <b>Randomisation:</b>            |         |                                                                                                                                                                                             |                     |
| Sequence generation              | 8a      | Method used to generate the random allocation sequence                                                                                                                                      | 05                  |
|                                  | 8b      | Type of randomisation; details of any restriction (such as blocking and block size)                                                                                                         | 05                  |
| Allocation concealment mechanism | 9       | Mechanism used to implement the random allocation sequence (such as sequentially numbered containers), describing any steps taken to conceal the sequence until interventions were assigned | 05                  |
| Implementation                   | 10      | Who generated the random allocation sequence, who enrolled participants, and who assigned participants to interventions                                                                     | 05                  |
| Blinding                         | 11a     | If done, who was blinded after assignment to interventions (for example, participants, care providers, those                                                                                | 05                  |

|                                                      |     |                                                                                                                                                   |         |
|------------------------------------------------------|-----|---------------------------------------------------------------------------------------------------------------------------------------------------|---------|
|                                                      |     | assessing outcomes) and how                                                                                                                       |         |
| Statistical methods                                  | 11b | If relevant, description of the similarity of interventions                                                                                       | 03      |
|                                                      | 12a | Statistical methods used to compare groups for primary and secondary outcomes                                                                     | 05      |
|                                                      | 12b | Methods for additional analyses, such as subgroup analyses and adjusted analyses                                                                  | N/A     |
| <b>Results</b>                                       |     |                                                                                                                                                   |         |
| Participant flow (a diagram is strongly recommended) | 13a | For each group, the numbers of participants who were randomly assigned, received intended treatment, and were analysed for the primary outcome    | 05      |
|                                                      | 13b | For each group, losses and exclusions after randomisation, together with reasons                                                                  | 05      |
| Recruitment                                          | 14a | Dates defining the periods of recruitment and follow-up                                                                                           |         |
|                                                      | 14b | Why the trial ended or was stopped                                                                                                                | N/A     |
| Baseline data                                        | 15  | A table showing baseline demographic and clinical characteristics for each group                                                                  | 05      |
| Numbers analysed                                     | 16  | For each group, number of participants (denominator) included in each analysis and whether the analysis was by original assigned groups           | 05      |
| Outcomes and estimation                              | 17a | For each primary and secondary outcome, results for each group, and the estimated effect size and its precision (such as 95% confidence interval) | 06-08   |
|                                                      | 17b | For binary outcomes, presentation of both absolute and relative effect sizes is recommended                                                       | N/A     |
| Ancillary analyses                                   | 18  | Results of any other analyses performed, including subgroup analyses and adjusted analyses, distinguishing pre-specified from exploratory         | N/A     |
| Harms                                                | 19  | All important harms or unintended effects in each group (for specific guidance see CONSORT for harms)                                             | 08      |
| <b>Discussion</b>                                    |     |                                                                                                                                                   |         |
| Limitations                                          | 20  | Trial limitations, addressing sources of potential bias, imprecision, and, if relevant, multiplicity of analyses                                  | N/A     |
| Generalisability                                     | 21  | Generalisability (external validity, applicability) of the trial findings                                                                         | 10      |
| Interpretation                                       | 22  | Interpretation consistent with results, balancing benefits and harms, and considering other relevant evidence                                     | 08 & 09 |
| <b>Other information</b>                             |     |                                                                                                                                                   |         |
| Registration                                         | 23  | Registration number and name of trial registry                                                                                                    | 03      |
| Protocol                                             | 24  | Where the full trial protocol can be accessed, if available                                                                                       | N/A     |
| Funding                                              | 25  | Sources of funding and other support (such as supply of drugs), role of funders                                                                   | 10      |

\*We strongly recommend reading this statement in conjunction with the CONSORT 2010 Explanation and Elaboration for important clarifications on all the items. If relevant, we also recommend reading CONSORT extensions for cluster randomised trials, non-inferiority and equivalence trials, non-pharmacological treatments, herbal interventions, and pragmatic trials. Additional extensions are forthcoming; for those and for up to date references relevant to this checklist, see [www.consort-statement.org](http://www.consort-statement.org).

**Supplementary Table 1.** Study treatment details

|                    | Treatment group A                                                                          | Treatment group B                                |
|--------------------|--------------------------------------------------------------------------------------------|--------------------------------------------------|
| Product            | AferFit ( <i>Aframomum melegueta</i> extract)                                              | Maltodextrin                                     |
| Dosage Form        | Capsules                                                                                   | Capsules                                         |
| Composition        | Capsule weight – 250 mg<br>AferFit extract powder – 250 mg<br>containing 5 mg of 6-paradol | Capsule weight – 250 mg<br>Maltodextrin – 250 mg |
| Route              | Oral                                                                                       | Oral                                             |
| Dose               | 250 mg                                                                                     | 250 mg                                           |
| Dosing Regimen     | Twice a day after food                                                                     | Twice a day after food                           |
| Treatment duration | 84 days                                                                                    | 84 days                                          |
| Manufacturer       | Vidya Herbs Pvt Ltd.                                                                       | Vidya Herbs Pvt Ltd.                             |

## Sample Size:

The sample size calculation was based on difference of 2 treatments are considered to be medically relevant. Assuming a common SD of 1.5 at the end of treatment, 35 per group would be sufficient to detect a difference of 1.1 in mean difference b/w the 2 treatment with power of 80% and a 0.05. 2-sided level of significance.

## R-Program:

```
power.t.test(n=NULL, delta=1.1, sd=1.5, sig.level=0.05, power=0.80,  
             type="two.sample", alternative="two.sided")
```

```
Two-sample t test power calculation
```

```
      n = 30.18116  
  delta = 1.1  
     sd = 1.5  
sig.level = 0.05  
  power = 0.8  
alternative = two.sided
```

NOTE: n is number in *each* group

A total of  $N$  number of subjects are required at each Treatment group in the end of the study with all the data being complete for analysis, but a proportion ( $q$ ) are expected to drop out before the study ends. In this case, the following total number of subjects ( $N1$ ) would have to be enrolled to ensure that the final sample size ( $N$ ) in each Treatment group is:

$$N1 = \frac{N}{1 - q} = \frac{31}{(1 - 0.10)} = 35$$

Where  $q$  is the proportion of attrition and is generally 10% in this type of studies.

Note: The proportion of eligible subjects who will refuse to participate (drop out) or provide the inadequate information will be unknown at the beginning of the study. Approximate estimates is often possible using information from similar studies.
